# Supplementary material
Source: publisher site journal article supplement (https://www.dovepress.com/article/482051)
Supplement: Supplementary file 1 [file get_supplementary_file.php]

# Supplementary Material

## Supplementary Table 1 The forward and reverse primers for qPCR detection

| Gene | Primers | Sequence (5’ to 3’) |
| --- | --- | --- |
| β-actin | Forward primer | GGCTGTATTCCCCTCCATCG |
| β-actin | Reverse primer | CCAGTTGGTAACAATGCCATGT |
| PGC-1α | Forward primer | ATGTGTCGCCTTCTTGCTCT |
| PGC-1α | Reverse primer | CGGTGTCTGTAGTGGCTTGA |
| NRF-1 | Forward primer | GTTGGTACAGGGGCAACAGT |
| NRF-1 | Reverse primer | TCGTCTGGATGGTCATTTCA |

A B
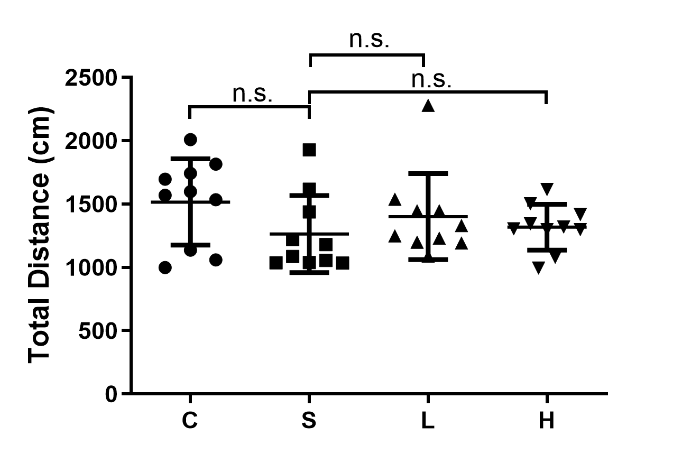

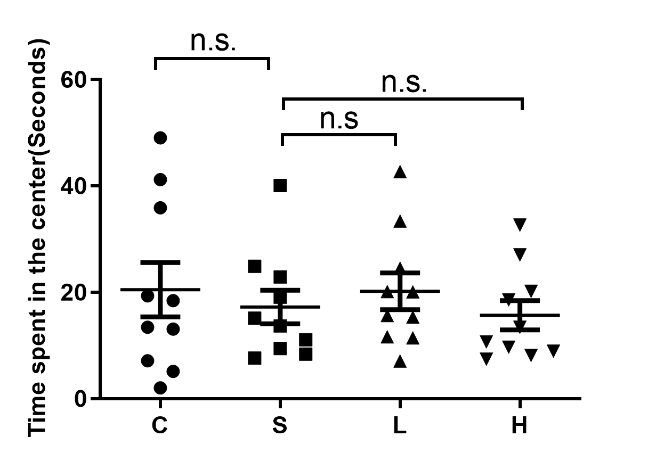


**Supplementary Figure 1** The sham (C group), the surgery and DMSO (S group), the surgery and ZLN005 (5 mg/(kg⋅d)) (L group), and the surgery and ZLN005 (7.5 mg/(kg⋅d)) (H group) (6 d post-surgery) mice were subjected to the open field test (n=10 per group). (A) Total distance traveled. (B) Time spent in the central zone of the arena were recorded. One-way analysis of variance (ANOVA); n.s. not significant; error bars denote the SEM.
